# Supplementary material for: Niclosamide induces protein ubiquitination and inhibits multiple pro-survival signaling pathways in the human glioblastoma U-87 MG cell line
Source: PLoS One. 2017 Sep 6;12(9):e0184324. doi: 10.1371/journal.pone.0184324 (PMC5587337; doi:10.1371/journal.pone.0184324)
Supplement: S4 Fig — (XLSX) [file pone.0184324.s004.xlsx]

## Sheet: Sheet1
% of Control
	Nicl:	0uM	0.625uM	1.25uM	2.5uM	5uM	10uM	20uM	40uM
		100.856	73.6441	63.8178	51.4915	55.6822	50.5466	33.8644	34.9237
		96.4661	75.0212	66.5975	50.839	47.6949	47.2924	42.3559	38.6314
		104.14	75.7034	62.5466	61.75	51.3008	45.6102	43.9619	41.0381
		104.195	77.8559	49.0593	48.3432	41.7542	44.7288	40.178	36.911
		100.39	83.5847	54.5169	54.5636	56.8729	45.9068	45.6653	37.2797
		96.2331	81.8898	66.0975	61.1907	50.2542	48.6568	45.0127	36.0466
		96.0508	70.3475	57.4068	65.4364	50.6186	46.6822	39.5424	38.2542
	Mean	99.7615	76.8638	60.0061	56.2306	50.5969	47.0605	41.5115	37.5835
	DEV	3.00986	3.63974	5.4386	5.62435	3.45348	1.51833	3.1285	1.47804
	SEM	1.13762	1.37569	2.0556	2.12581	1.30529	0.573876	1.18246	0.558645
